# Supplementary material
Source: PubMed Central journal article supplement (PMC5533186)

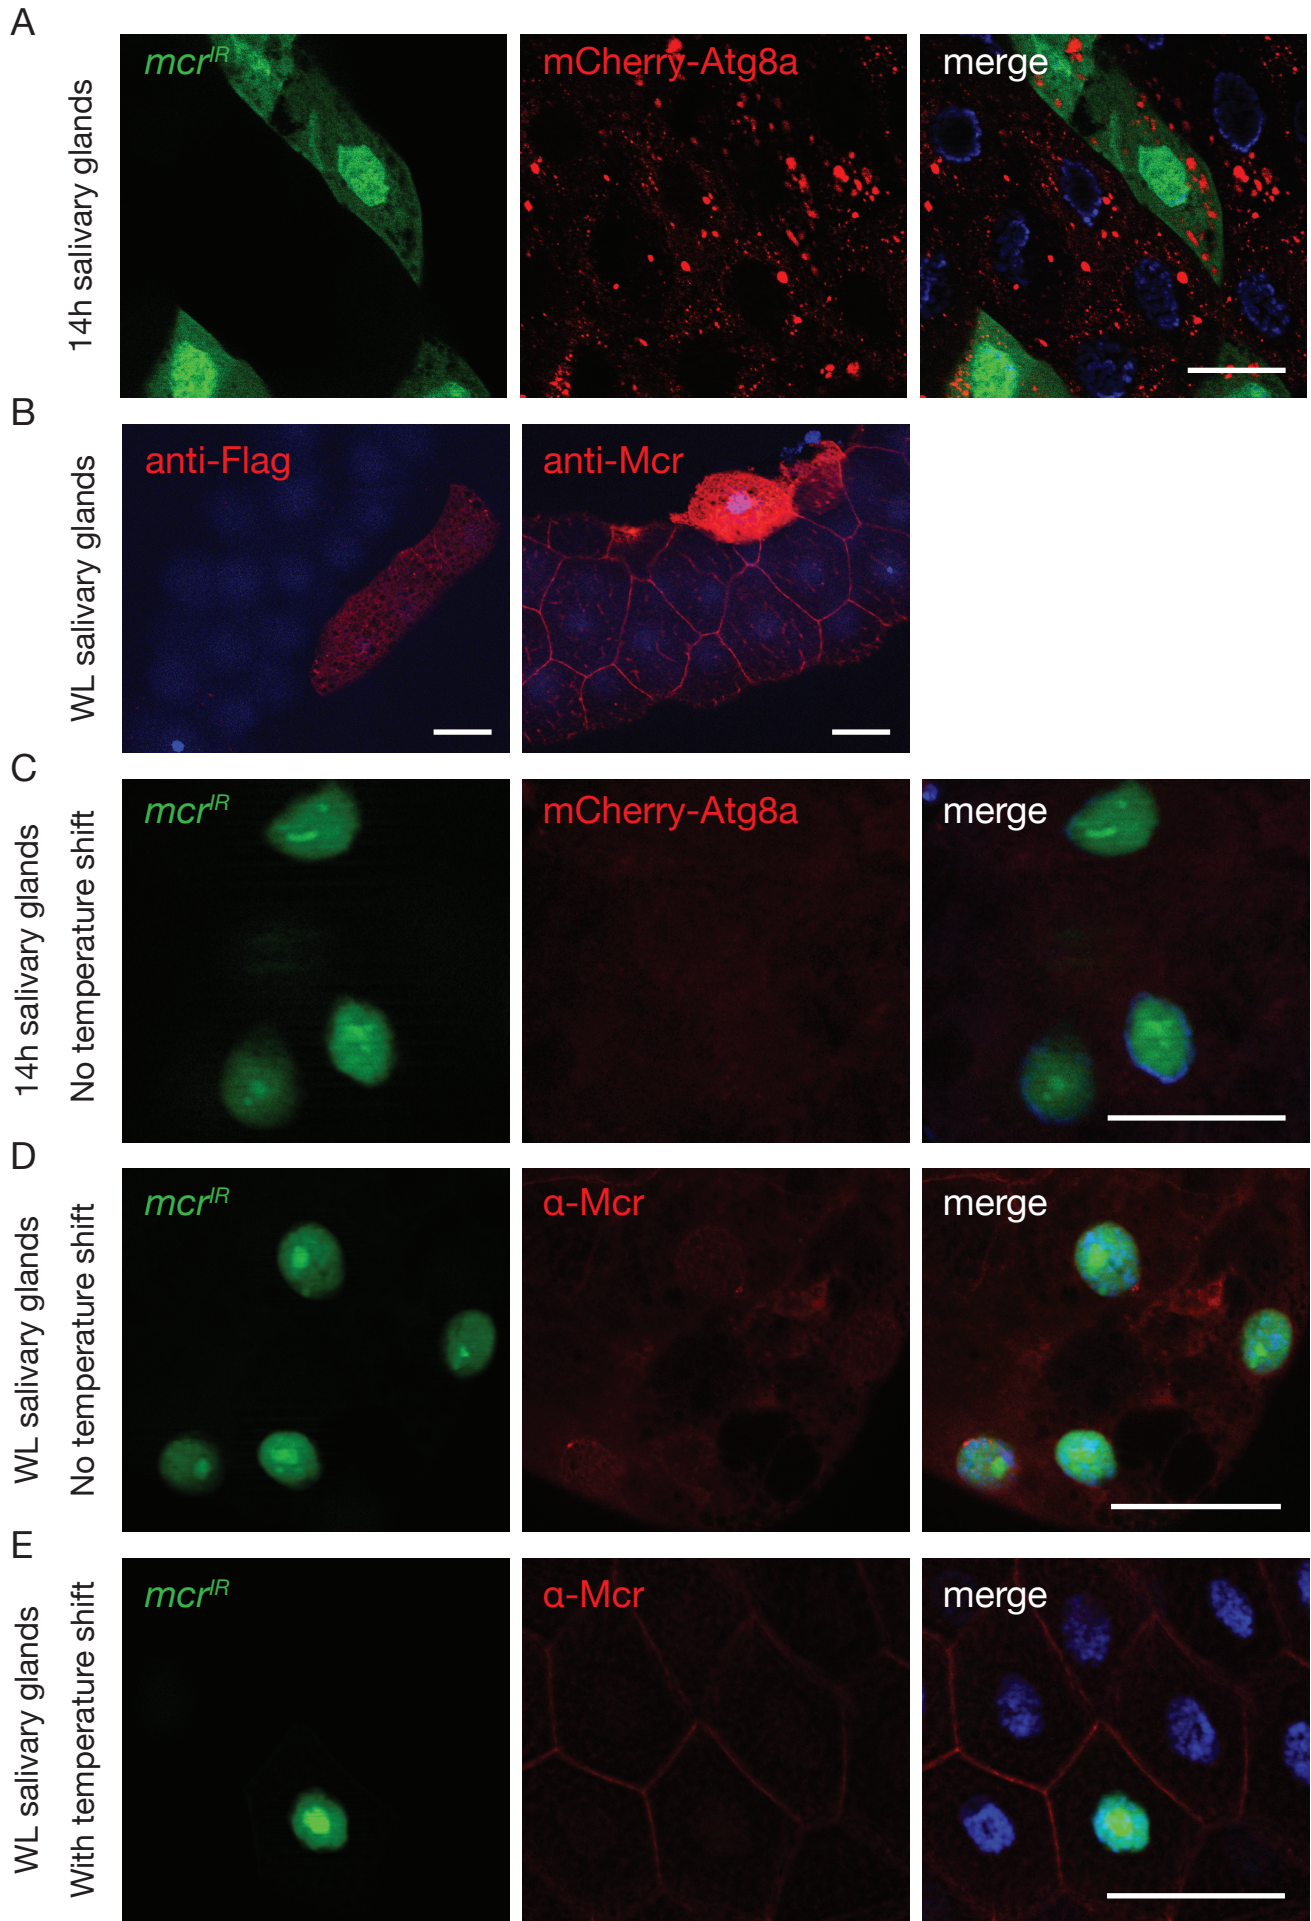

Supplement: NIHMS885444-supplement-s3.pdf [file NIHMS885444-supplement-s3.pdf]
